# Supplementary material for: Applying GRADE-CERQual to qualitative evidence synthesis findings–paper 7: understanding the potential impacts of dissemination bias
Source: PubMed Central journal article supplement (PMC5791043; doi:10.1186/s13012-017-0694-5), 2018-01-25
Supplement: 13012_2017_694_MOESM1_ESM.pdf [file 13012_2017_694_MOESM1_ESM.pdf]

## Additional file 1: Key definitions relevant to CERQual

**Adequacy of data:** an overall determination of the degree of richness as well as the quantity of data supporting a review finding [1].

**Coherence of the review finding:** how clear and cogent the fit is between the data from the primary studies and a review finding that synthesizes that data [2].

**Confidence in the evidence:** an assessment of the extent to which a review finding is a reasonable representation of the phenomenon of interest [1].

**Dissemination bias in qualitative research:** a systematic distortion of the phenomenon of interest due to selective dissemination of qualitative studies or the findings of qualitative studies [1].

**Methodological limitations:** the extent to which there are concerns about the design or conduct of the primary studies that contributed evidence to an individual review finding [1].

**Phenomenon of interest:** the issue that is the focus of the qualitative inquiry – that is, “what we want our research to understand...[]... explain, or describe” [3](p129).

**Relevance:** the extent to which the body of data from the primary studies supporting a review finding is applicable to the context specified in the review question [1].

**Review finding:** An analytic output (e.g., a theme, category, thematic framework, theory or contribution to theory) from a qualitative evidence synthesis that, based on data from primary studies, describes a phenomenon or an aspect of a phenomenon [1].

## References

1. Lewin S, Glenton C, Munthe-Kaas H, Carlsen B, Colvin CJ, Gulmezoglu M, Noyes J, Booth A, Garside R, Rashidian A: **Using qualitative evidence in decision making for health and social interventions: an approach to assess confidence in findings from qualitative evidence syntheses (GRADE-CERQual)**. *PLoS Med* 2015, **12**(10):e1001895.
2. Colvin CJ, Garside R, Wainwright M, Lewin S, Bohren M, Glenton C, Munthe-Kaas HM, Carlsen B, Tuncalp Ö, Noyes J *et al*: **Applying GRADE-CERQual to qualitative evidence synthesis findings - paper 4 of 7: how to assess coherence**. *Implementation Science* 2017, **12** Suppl 2.
3. Rappaport J: **Terms of empowerment/exemplars of prevention: toward a theory for community psychology**. *Am J Community Psychol* 1987, **15**(2):121-148.
